# Supplementary material
Source: PubMed Central journal article supplement (PMC3269923)

**SUPPLEMENTAL FIGURE 1. Creatinine over time for the eight subjects who developed anti-HLA circulating alloantibodies.** Subjects D and E were both diagnosed with acute cellular rejection on their 6-month protocol biopsy.

Creatinine (mg/dL)

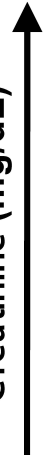

**Subject A**

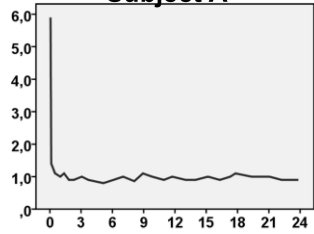

**Subject E**

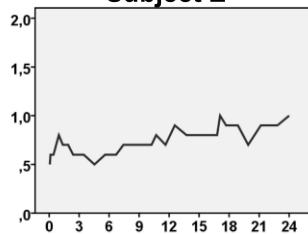

**Subject B**

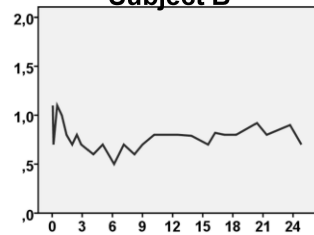

**Subject F**

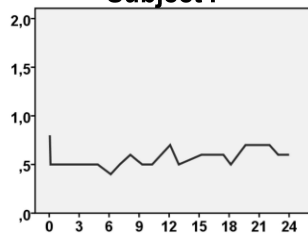

**Subject C**

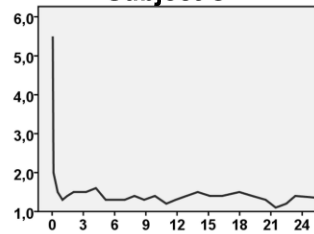

**Subject G**

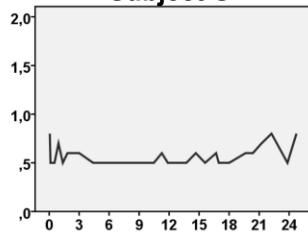

**Subject D**

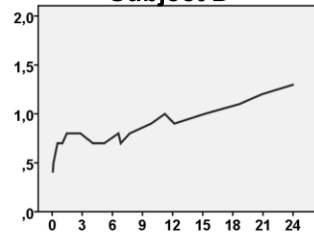

**Subject H**

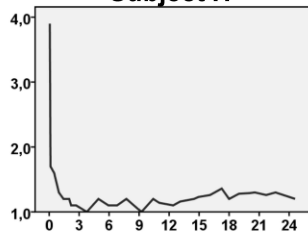

Time post transplant  
(month)

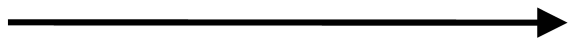

Supplement: ASN.2011040360_ASN2011040360SupplementaryData.pdf [file ASN.2011040360_ASN2011040360SupplementaryData.pdf]
